# Supplementary material
Source: publisher figshare collection journal article supplement (https://sage.figshare.com/ndownloader/files/13748507)
Supplement: Supplementary file 1 [file 13748507]

## Supplemental Material

Table 1. Study quality on the PEDro scale

| Study                                    | 1 | 2 | 3 | 4 | 5 | 6 | 7 | 8 | 9 | 10 | 11 | Total |
|------------------------------------------|---|---|---|---|---|---|---|---|---|----|----|-------|
| 1. Coroian et al, 2017 <sup>12</sup>     | ✓ | ✓ |   | ✓ |   |   | ✓ | ✓ | ✓ | ✓  | ✓  | 6     |
| 2. Gharib & Mohamed, 2017 <sup>13</sup>  | ✓ | ✓ |   | ✓ |   |   |   | ✓ |   | ✓  | ✓  | 7     |
| 3. Singhal et al, 2017 <sup>14</sup>     | ✓ | ✓ |   | ✓ |   |   |   |   |   | ✓  | ✓  | 4     |
| 4. Chen et al, 2015 <sup>15</sup>        | ✓ | ✓ |   | ✓ |   |   |   |   |   | ✓  | ✓  | 4     |
| 5. Sen et al, 2015 <sup>16</sup>         | ✓ | ✓ |   | ✓ |   |   |   | ✓ |   | ✓  | ✓  | 5     |
| 6. Lee et al, 2013 <sup>17</sup>         | ✓ | ✓ |   | ✓ |   |   |   | ✓ |   | ✓  | ✓  | 5     |
| 7. Milot et al, 2013 <sup>18</sup>       | ✓ | ✓ |   | ✓ |   |   | ✓ | ✓ | ✓ | ✓  | ✓  | 7     |
| 8. Sekhar et al, 2013 <sup>19</sup>      | ✓ | ✓ |   | ✓ |   |   |   | ✓ |   | ✓  | ✓  | 5     |
| 9. Shimodozono et al, 2010 <sup>20</sup> | ✓ |   |   | ✓ |   |   |   | ✓ |   | ✓  | ✓  | 4     |
| 10. Kim et al, 2008 <sup>21</sup>        |   | ✓ |   | ✓ |   |   |   | ✓ |   | ✓  | ✓  | 5     |
| 11. Seo et al, 2003 <sup>22</sup>        |   |   |   | ✓ |   |   |   |   |   | ✓  | ✓  | 3     |
| 12. Kim et al, 2001 <sup>23</sup>        | ✓ | ✓ |   | ✓ |   |   | ✓ | ✓ | ✓ | ✓  | ✓  | 7     |
| 13. Engardt et al, 1995 <sup>24</sup>    |   |   |   | ✓ |   |   |   | ✓ | ✓ | ✓  | ✓  | 5     |

1: eligibility criteria and source of participants; 2: random allocation; 3: concealed allocation; 4: baseline comparability; 5: blinded participants; 6: blinded therapists; 7: blind assessors; 8: adequate follow-up; 9: intention-to-treat analysis; 10: between-group comparisons; 11: point estimates and variability.

\*Item 1 does not contribute to the total score

## **Electronic Supplementary File 1: Search strategy MEDLINE via PUBMED**

---

1. Randomized Controlled Trials/
2. Random allocation/
3. Controlled Clinical Trials/
4. Control groups/
5. Clinical trials/ or clinical trials, phase i/ or clinical trials, phase ii/ or clinical trials, phase iii/ or clinical trials, phase iv/
6. Clinical Trials Data Monitoring Committees/
7. Double-blind method/
8. Single-blind method/
9. Placebos/
10. Placebo effect/
11. Cross-over studies/
12. Multicenter Studies/
13. 1 OR 2 OR 3 OR 4 OR 5 OR 6 OR 7 OR 8 OR 9 OR 10 OR 11 OR 12
14. Strokes
15. Cerebrovascular Accident
16. Cerebrovascular Accidents
17. CVA (Cerebrovascular Accident)
18. CVAs (Cerebrovascular Accident)
19. Cerebrovascular Apoplexy
20. Apoplexy, Cerebrovascular
21. Vascular Accident, Brain
22. Brain Vascular Accident
23. Brain Vascular Accidents
24. Vascular Accidents, Brain
25. Cerebrovascular Stroke
26. Cerebrovascular Strokes
27. Stroke, Cerebrovascular
28. Strokes, Cerebrovascular
29. Apoplexy
30. Cerebral Stroke
31. Cerebral Strokes

35 32. Stroke, Cerebral  
36 33. Strokes, Cerebral  
37 34. Stroke, Acute  
38 35. Acute Stroke  
39 36. Acute Strokes  
40 37. Strokes, Acute  
41 38. Cerebrovascular Accident, Acute  
42 39. Acute Cerebrovascular Accident  
43 40. Acute Cerebrovascular Accidents  
44 41. Cerebrovascular Accidents, Acute  
45 42. 14 OR 15 OR 16 OR 17 OR 18 OR 19 OR 20 OR 21 OR 22 OR 23 OR 24 OR 25  
46 OR 26 OR 27 OR 28 OR 29 OR 30 OR 31 OR 32 OR 33 OR 34 OR 35 OR 36 OR 37  
47 OR 38 OR 39 OR 40 OR 41  
48 43. Dynamometer, Muscle Strength  
49 44. Dynamometers, Muscle Strength  
50 45. Muscle Strength Dynamometers  
51 46. Muscle Strength Dynamometer  
52 47. Training, Resistance  
53 48. Strength Training  
54 49. Training, Strength  
55 50. Weight-Lifting Strengthening Program  
56 51. Strengthening Program, Weight-Lifting  
57 52. Strengthening Programs, Weight-Lifting  
58 53. Weight Lifting Strengthening Program  
59 54. Weight-Lifting Strengthening Programs  
60 55. Weight-Lifting Exercise Program  
61 56. Exercise Program, Weight-Lifting  
62 57. Exercise Programs, Weight-Lifting  
63 58. Weight Lifting Exercise Program  
64 59. Weight-Lifting Exercise Programs  
65 60. Weight-Bearing Strengthening Program  
66 61. Strengthening Program, Weight-Bearing  
67 62. Strengthening Programs, Weight-Bearing  
68 63. Weight Bearing Strengthening Program

69 64. Weight-Bearing Strengthening Programs  
70 65. Weight-Bearing Exercise Program  
71 66. Exercise Program, Weight-Bearing  
72 67. Exercise Programs, Weight-Bearing  
73 68. Weight Bearing Exercise Program  
74 69. Weight-Bearing Exercise Programs  
75 70. 43 OR 44 OR 45 OR 46 OR 47 OR 48 OR 49 OR 50 OR 51 OR 52 OR 53 OR 54  
76 OR 55 OR 56 OR 57 OR 58 OR 59 OR 60 OR 61 OR 62 OR 63 OR 64 OR 65 OR 66  
77 OR 67 OR 68 OR 69  
78 71. 13 AND 42 AND 70

---

79  
80  
81  
82  
83  
84  
85  
86  
87  
88  
89  
90  
91  
92  
93  
94  
95  
96  
97  
98  
99

## Electronic Supplementary File 2: Summary of findings:

### Isokinetic strength training compared to Conventional Rehabilitation for Stroke

**Patient or population:** Stroke

**Setting:** Clinical Rehabilitation

**Intervention:** Isokinetic strength training

**Comparison:** Conventional Rehabilitation

| Outcomes                             | Anticipated absolute effects*<br>(95% CI)         |                                                                                                      | Relative effect<br>(95% CI) | No of participants<br>(studies) | Certainty of the evidence<br>(GRADE) | Comments |
|--------------------------------------|---------------------------------------------------|------------------------------------------------------------------------------------------------------|-----------------------------|---------------------------------|--------------------------------------|----------|
|                                      | WMD in<br>Conventional<br>Rehabilitation          | WMD in<br>Isokinetic<br>strength<br>training                                                         |                             |                                 |                                      |          |
| Isokinetic strength - Knee Extension | -                                                 | -                                                                                                    | -                           | 146<br>(5 RCTs)                 | ⊕⊕⊕○<br>MODERATE<br>a                |          |
| Timed Up and Go (TUG)                | The mean timed Up and Go was <b>-2.51</b> seconds | The mean timed Up and Go in the intervention group was 3,23 seconds lower (5,51 lower to 0,96 lower) | -                           | 141<br>(5 RCTs)                 | ⊕⊕⊕○<br>MODERATE<br>a                |          |
| Gait Speed                           | -                                                 | -                                                                                                    | -                           | 137<br>(5 RCTs)                 | ⊕⊕○○<br>LOW<br>a,b                   |          |

\***The risk in the intervention group** (and its 95% confidence interval) is based on the assumed risk in the comparison group and the **relative effect** of the intervention (and its 95% CI).

CI: Confidence interval; **SMD**: Standardised mean difference; **WMD**: Weighted mean difference

#### GRADE Working Group grades of evidence

**High certainty:** We are very confident that the true effect lies close to that of the estimate of the effect

**Moderate certainty:** We are moderately confident in the effect estimate: The true effect is likely to be close to the estimate of the effect, but there is a possibility that it is substantially different

**Low certainty:** Our confidence in the effect estimate is limited: The true effect may be substantially different from the estimate of the effect

**Very low certainty:** We have very little confidence in the effect estimate: The true effect is likely to be substantially different from the estimate of effect

#### Explanations

a. Studies without allocation concealment, random allocation, and/or sample size calculation.

b. Meta-analysis with statistical significance in heterogeneity test and high I<sup>2</sup>. I<sup>2</sup>=43%

103 **Electronic Supplementary File 3.** Articles excluded from the full-text eligibility analysis.

104

| Study                                                                                                                                                                                                                                     | Population | Intervention         | Study Design        | Outcomes |
|-------------------------------------------------------------------------------------------------------------------------------------------------------------------------------------------------------------------------------------------|------------|----------------------|---------------------|----------|
| Ghroubi S, Kossemtini W, Mahersi S, Elleuch W, Chaabene M, Elleuch MH. Contribution of isokinetic muscle strengthening in the rehabilitation of obese subjects. Ann Phys Rehabil Med. 2016;59(2):87-93. doi: 10.1016/j.rehab.2016.01.005. | Obese      | §                    | §                   | §        |
| Kim S, Cho HY, Kim KH, Lee SM. Effects of ankle biofeedback training on strength, balance, and gait in patients with stroke. J Phys Ther Sci. 2016;28(9):2596-2600.                                                                       | §          | Biofeedback training | §                   | §        |
| Sin M, Kim WS, Park D, Min YS, Kim WJ, Cho K, Paik NJ. Electromyographic analysis of upper limb muscles during standardized isotonic and isokinetic robotic exercise of spastic elbow in patients with stroke. J Electromyogr Kinesiol.   | §          | §                    | Nonrandomized trial | §        |

2014;24(1):11-7. doi:

10.1016/j.jelekin.2013.10.002.

Chang JJ, Tung WL, Wu WL, Huang MH, Su FC. Effects of robot-aided bilateral force-induced isokinetic arm training combined with conventional rehabilitation on arm motor function in patients with chronic stroke. Arch Phys Med Rehabil 2007;88(10):1332–8.

Teixeira-Salmela LF, Olney SJ, Nadeau S, Brouwer B. Muscle strengthening and physical conditioning to reduce impairment and disability in chronic stroke survivors. Arch Phys Med Rehabil. 1999;80(10):1211-8.

Sharp SA, Brouwer BJ. Isokinetic strength training of the hemiparetic knee: effects on function and spasticity. Arch Phys Med Rehabil. 1997;78(11):1231-6.

§

§

Nonrandomized trial

§

§

Conventional muscle strengthening

§

§

§

§

Nonrandomized self-controlled trial.

§
